# Supplementary material
Source: publisher figshare collection journal article supplement (https://karger.figshare.com/articles/dataset/_/3859146)
Supplement: Supplementary file 1 [file 1]

**Suppl. Table 2:** Logistic regression analyses to compare the prevalence of high resilience between study samples. Dependent variable: 1=high resilience; 0=low resilience.

| <i>Dependent variable:</i>                         |                                 |                 |           |                  |                |
|----------------------------------------------------|---------------------------------|-----------------|-----------|------------------|----------------|
| <b>High resilience<sup>#</sup> in the face of:</b> | <b>Contrast between studies</b> |                 | <b>OR</b> | <b>Wald (df)</b> | <b>p-value</b> |
| <b>More severe dementia</b>                        | <i>Overall difference</i>       |                 | n.a.      | 11.35 (3)        | 0.010          |
|                                                    | FamCare                         | vs REMCARE      | 0.30      | 11.34 (1)        | 0.001*         |
|                                                    | COMPAS                          | vs REMCARE      | 0.74      | 2.04 (1)         | 0.153          |
|                                                    | MCSP studies                    | vs REMCARE      | 1.33      | 0.74 (1)         | 0.390          |
|                                                    | FamCare                         | vs MCSP studies | 0.41      | 4.66 (1)         | 0.031          |
|                                                    | FamCare                         | vs COMPAS       | 0.41      | 7.40 (1)         | 0.007*         |
|                                                    | COMPAS                          | vs MCSP studies | 0.99      | 0.002 (1)        | 0.967          |
| <b>Basic self-care limitations</b>                 | <i>Overall difference</i>       |                 | n.a.      | 29.52 (3)        | <0.001         |
|                                                    | FamCare                         | vs REMCARE      | 0.21      | 29.06 (1)        | <0.001*        |
|                                                    | COMPAS                          | vs REMCARE      | 0.63      | 4.79 (1)         | 0.029          |
|                                                    | MCSP studies                    | vs REMCARE      | 0.65      | 2.63 (1)         | 0.105          |
|                                                    | FamCare                         | vs MCSP studies | 0.33      | 10.52 (1)        | 0.001*         |
|                                                    | FamCare                         | vs COMPAS       | 0.34      | 12.77 (1)        | <0.001*        |
|                                                    | COMPAS                          | vs MCSP studies | 0.97      | 0.01 (1)         | 0.911          |
| <b>Behavioural/ mood problems</b>                  | <i>Overall difference</i>       |                 | n.a.      | 20.52 (3)        | <0.001         |
|                                                    | FamCare                         | vs REMCARE      | 0.25      | 17.10 (1)        | <0.001*        |
|                                                    | COMPAS                          | vs REMCARE      | 0.53      | 8.33 (1)         | 0.004*         |
|                                                    | MCSP studies                    | vs REMCARE      | 0.69      | 1.48 (1)         | 0.223          |
|                                                    | FamCare                         | vs MCSP studies | 0.36      | 6.11 (1)         | 0.013          |
|                                                    | FamCare                         | vs COMPAS       | 0.47      | 4.78 (1)         | 0.029          |
|                                                    | COMPAS                          | vs MCSP studies | 0.78      | 0.63 (1)         | 0.429          |

|                                       |                    |                 |      |           |         |
|---------------------------------------|--------------------|-----------------|------|-----------|---------|
| <b>Substantial time spend caring</b>  | Overall difference |                 | n.a. | 23.58 (3) | <0.001  |
|                                       | FamCare            | vs REMCARE      | 0.40 | 11.44 (1) | 0.001*  |
|                                       | COMPAS             | vs REMCARE      | 0.35 | 13.33 (1) | <0.001* |
|                                       | MCSP studies       | vs REMCARE      | 0.39 | 10.58 (1) | 0.001*  |
|                                       | FamCare            | vs MCSP studies | 1.02 | 0.003 (1) | 0.960   |
|                                       | FamCare            | vs COMPAS       | 1.15 | 0.16 (1)  | 0.691   |
|                                       | COMPAS             | vs MCSP studies | 0.89 | 0.11 (1)  | 0.738   |
| <b>More than one high care demand</b> | Overall difference |                 | n.a. | 30.66 (3) | <0.001  |
|                                       | FamCare            | vs REMCARE      | 0.24 | 25.99 (1) | <0.001* |
|                                       | COMPAS             | vs REMCARE      | 0.50 | 12.88 (1) | <0.001* |
|                                       | MCSP studies       | vs REMCARE      | 0.56 | 4.61 (1)  | 0.032   |
|                                       | FamCare            | vs MCSP studies | 0.42 | 6.33 (1)  | 0.012   |
|                                       | FamCare            | vs COMPAS       | 0.48 | 6.62 (1)  | 0.010   |
|                                       | COMPAS             | vs MCSP studies | 0.89 | 0.19 (1)  | 0.662   |

Abbreviations: OR; Odds Ratio

\* Statistically significant ( $p < 0.0083$ ) with a Bonferroni correction for multiple comparisons (0.05/6)

# Resilience was measured with five definitions defined as good or poor psychological well-being in the face of high caregiving demands.
