# Supplementary material
Source: publisher figshare collection journal article supplement (https://karger.figshare.com/articles/dataset/_/3859146)
Supplement: Supplementary file 2 [file 1]

**Suppl. Table 1:** Harmonization of variables

|                                 | <b>Variable</b>                | <b>Study</b>                 | <b>Scale or question, Categories</b>                                                                                                                 | <b>Transformation</b>                               | <b>Harmonized</b>               |
|---------------------------------|--------------------------------|------------------------------|------------------------------------------------------------------------------------------------------------------------------------------------------|-----------------------------------------------------|---------------------------------|
| <b>Resilience – Outcome</b>     | Psychological well-being       | REMCARE<br>MCSP 1<br>MCSP 2  | GHQ-28 item version ( <u>0</u> -28)                                                                                                                  | Dichotomized at clinically relevant threshold (5/6) | Poor / Good                     |
|                                 |                                | FAMCARE<br>COMPAS            | GHQ-12 item version ( <u>0</u> -12)                                                                                                                  | Dichotomized at clinically relevant threshold (1/2) |                                 |
| <b>Resilience – Adversities</b> | Severity of dementia           | REMCARE<br>FAMCARE           | CDR ( <u>0</u> -3)<br><br>0 No dementia<br>0.5 Very mild<br>1 Mild<br>2 Moderate<br>3 Severe                                                         | 0/0.5/1 = Mild<br>2/3 = Moderate or severe          | Mild / Moderate or severe       |
|                                 |                                | COMPAS                       | MMSE ( <u>0</u> - <u>30</u> )<br><br>21-30 Mild<br>11–20 Moderate<br>0–10 Severe                                                                     | 21-30 = Mild<br>0-20 = Moderate or severe           |                                 |
|                                 |                                | MCSP 1<br>MCSP 2             | GDS ( <u>1</u> -7)<br><br>1 No cognitive decline<br>2 Very mild<br>3 Mild<br>4 Moderate<br>5 Moderately severe<br>6 Severe<br>7 Very severe          | 1/2/3 = Mild<br>4/5/6/7 = Moderate or severe        |                                 |
|                                 |                                |                              |                                                                                                                                                      |                                                     |                                 |
|                                 | Limitations in basic self-care | REMCARE<br>FAMCARE<br>COMPAS | EQ-5D item ‘Self-care’<br><br>0 no problems with self-care<br>1 some problems washing or dressing themselves<br>2 unable to wash or dress themselves | 0= No<br>1/2= Some or severe limitations            | No / Some or severe limitations |
|                                 |                                | MCSP 1<br>MCSP 2             | ASEP item ‘Needs help with dressing’<br><br>0 Never<br>1 Sometimes                                                                                   | 0= No<br>1/2= Some or severe                        |                                 |

|                            |                             |                                                                                                                                                                                                                  |                                                                                                |                                                                          |
|----------------------------|-----------------------------|------------------------------------------------------------------------------------------------------------------------------------------------------------------------------------------------------------------|------------------------------------------------------------------------------------------------|--------------------------------------------------------------------------|
|                            |                             | 2 Frequently                                                                                                                                                                                                     |                                                                                                |                                                                          |
| Behavioural/ mood problems | REMCARE<br>MCSP 1<br>MCSP 2 | CSDD (0-38)                                                                                                                                                                                                      | Dichotomized at clinically relevant cut-point (Score higher than 7)                            | Clinically relevant or serious mood problems<br>No / Yes                 |
|                            | FAMCARE<br>COMPAS<br>MCSP 2 | NPI-Mood Domains (severity*frequency score per domain 0-12)                                                                                                                                                      | Two or more clinically relevant ( $\geq 4$ ) or at least one serious ( $\geq 9$ ) mood symptom |                                                                          |
| Amount of care             | REMCARE                     | How many hours do you spend each week performing care tasks for your relative?                                                                                                                                   | Hours per week                                                                                 | Less than 40 hours of care per week / At least 40 hours of care per week |
|                            | FAMCARE                     | How many hours do you spend each week accompanying/ caring for your relative?                                                                                                                                    | Hours per week                                                                                 |                                                                          |
|                            | COMPAS                      | How many hours did you spend last week on ... [household activities, personal care, transport or visits outside the home]? Choose another week if your time spent on activities was very different than average. | Hours per week                                                                                 |                                                                          |
|                            | MCSP 1<br>MCSP 2            | How many days a week on average do you spend caring for the person with dementia? And how many hours per day?                                                                                                    | Hours per week                                                                                 |                                                                          |
| <b>Socio-demographics</b>  | Caregiver age               | REMCARE<br>FAMCARE<br>COMPAS<br>MCSP 1<br>MCSP 2                                                                                                                                                                 | Age on day of interview                                                                        | Age in years                                                             |
|                            | Caregiver gender            | REMCARE<br>FAMCARE<br>COMPAS<br>MCSP 1<br>MCSP 2                                                                                                                                                                 | Gender                                                                                         | Male/ female                                                             |
|                            | Caregiver (self) employed   | REMCARE<br>FAMCARE                                                                                                                                                                                               | Which of the following best describes your current employment status?                          | Paid / self-employed = Yes<br>Yes / No                                   |

|                        |                            |                                                                                                                                                                                                                                                                                                                                              |                                                                                                                   |                                           |  |
|------------------------|----------------------------|----------------------------------------------------------------------------------------------------------------------------------------------------------------------------------------------------------------------------------------------------------------------------------------------------------------------------------------------|-------------------------------------------------------------------------------------------------------------------|-------------------------------------------|--|
|                        |                            | Paid or self-employment / Unemployed / Homemaker / Retired                                                                                                                                                                                                                                                                                   | Other= No                                                                                                         |                                           |  |
|                        | COMPAS<br>MCSP 1<br>MCSP 2 | Do you have paid work at this moment?<br>Yes / No                                                                                                                                                                                                                                                                                            |                                                                                                                   |                                           |  |
| Educational level      | REMCARE<br>FAMCARE         | At what age did the caregiver leave full time education?<br>Age (years)                                                                                                                                                                                                                                                                      | 0-15 = Lower or elementary<br>16 or older= Secondary or higher                                                    | Lower or elementary / Secondary or higher |  |
|                        | COMPAS                     | What is the highest education you completed?<br>1 Less than 6 classes of primary school / 2 Six primary school classes / 3 More than primary school or primary school with uncompleted further education / 4 Practical training/ 5 Secondary vocational education/ 6 Pre-university education/ 7 University or higher professional education | 1/2/3= Lower/ elementary<br>4-6= Secondary or higher                                                              |                                           |  |
|                        | MCSP 1<br>MCSP 2           | What is the highest education you completed?<br>0 Primary school / 1 Junior secondary pre-vocational education / 2 Secondary vocational education / 3 Junior general secondary education / 4 Pre-university education / 5 University or higher professional education                                                                        | 0=Lower/ elementary<br>1-5= Secondary or higher                                                                   |                                           |  |
| <b>Context of care</b> | Cohabiting with PwD        | REMCARE<br>FAMCARE                                                                                                                                                                                                                                                                                                                           | Do you live in the same household as your relative?<br>Yes / No                                                   | Yes / No                                  |  |
|                        |                            | COMPAS                                                                                                                                                                                                                                                                                                                                       | Do you live together with the care receiver?<br>Yes / No                                                          |                                           |  |
|                        |                            | MCSP 1<br>MCSP 2                                                                                                                                                                                                                                                                                                                             | Distance to the household of the person with dementia<br>Living together/ Walking distance/ Same town/ Other town | Living together = Yes<br>Other = No       |  |
|                        | Relationship with PwD      | REMCARE<br>FAMCARE                                                                                                                                                                                                                                                                                                                           | Relationship to patient:<br>Spouse/ Son or daughter / Son or daughter in law/                                     | Spouse/ Other<br>Spouse / Other           |  |

|                                           |                             |                                                                                                                               |                                                                        |                                            |
|-------------------------------------------|-----------------------------|-------------------------------------------------------------------------------------------------------------------------------|------------------------------------------------------------------------|--------------------------------------------|
|                                           |                             | Brother or sister/ Other relative/ Friend/ Neighbour/<br>Other, please specify                                                |                                                                        |                                            |
|                                           | COMPAS                      | What is your relationship with the care receiver? I am..                                                                      | Husband, wife or life partner = Spouse                                 |                                            |
|                                           |                             | Husband, wife or life partner/ Sister (in law) or brother (in law) / Daughter (in law) or son (in law)/ Other, please specify | Others= Other                                                          |                                            |
|                                           | MCSP 1<br>MCSP 2            | What is your relationship with the care receiver? I am..                                                                      | Life partner or spouse= Spouse                                         |                                            |
|                                           |                             | Life partner or spouse/ Daughter/ Son/ Other relative/ Neighbour/ Friend/ Acquaintance/ Son in law/ Daughter in law           | Others= Other                                                          |                                            |
| Quality of patient-caregiver relationship | REMCARE                     | QCPR item "There is a big distance in the relationship between my relative and myself" [9]                                    | Converted to a 4-point score with the formula:<br>(3/4)* score + (1/4) | Continuous score 1-4                       |
|                                           | FAMCARE<br>COMPAS           | SSCQ item "I wish that my relative and I had a better relationship"                                                           | Converted to a 4-point score with the formula:<br>(3/4)* score + (1/4) |                                            |
|                                           | MCSP 1<br>MCSP 2            | SSCQ item "I wish that my relative and I had a better relationship"                                                           | Continuous score 1-4                                                   |                                            |
| Care burden                               | REMCARE                     | RSS (0-60)                                                                                                                    | Z-score                                                                | Standardized scale                         |
|                                           | FAMCARE<br>COMPAS<br>MCSP 2 | NPI-D (0-60)                                                                                                                  | Z-score                                                                |                                            |
|                                           | MCSP 1                      | CSI (0-13)                                                                                                                    | Z-score                                                                |                                            |
| Type of dementia                          | REMCARE<br>FAMCARE          | n/a                                                                                                                           |                                                                        | Harmonized across COMPAS and MCSP studies. |

|                              |                    |                                                                                                                                                                                   |                                                    |                                                           |
|------------------------------|--------------------|-----------------------------------------------------------------------------------------------------------------------------------------------------------------------------------|----------------------------------------------------|-----------------------------------------------------------|
|                              |                    |                                                                                                                                                                                   |                                                    | Alzheimer's disease /<br>Other or not specified           |
|                              | COMPAS             | Type of dementia                                                                                                                                                                  | Alzheimer's<br>disease / Other<br>or not specified |                                                           |
|                              |                    | Alzheimer's disease / Vascular/ Mixed/ Not known                                                                                                                                  | or not specified                                   |                                                           |
|                              | MCSP 1<br>MCSP 2   | Diagnosis of dementia                                                                                                                                                             | Alzheimer's<br>disease / Other<br>or not specified |                                                           |
|                              |                    | Alzheimer's disease/ Vascular/ Mixed/ Frontal<br>temporal/ Lewy body/ Other or not specified                                                                                      | or not specified                                   |                                                           |
| Time since first<br>symptoms | REMCARE<br>FAMCARE | n/a                                                                                                                                                                               |                                                    | <i>Harmonized across<br/>COMPAS and MCSP<br/>studies.</i> |
|                              | COMPAS             | How long ago did your relative started to have<br>dementia symptoms (e.g. changes in behavior or<br>memory problems)?                                                             | Converted in<br>years                              | Years since symptoms                                      |
|                              |                    | Months since symptoms                                                                                                                                                             |                                                    |                                                           |
|                              | MCSP 1<br>MCSP 2   | Months since symptoms                                                                                                                                                             | Converted in<br>years                              |                                                           |
| Use of home care             | REMCARE<br>FAMCARE | Has your relative used services provided by a home<br>care worker or care over the past 3 months?                                                                                 | 1 or more = Yes<br>0 = No                          | Yes / No                                                  |
|                              |                    | Number of visits                                                                                                                                                                  |                                                    |                                                           |
|                              | COMPAS             | Does your relative receive home care?                                                                                                                                             |                                                    |                                                           |
|                              |                    | No / Yes, ... hours per week (past three months)                                                                                                                                  |                                                    |                                                           |
|                              | MCSP 1<br>MCSP 2   | Use of home care services?                                                                                                                                                        |                                                    |                                                           |
|                              |                    | No / Yes                                                                                                                                                                          |                                                    |                                                           |
| Use of day care              | REMCARE<br>FAMCARE | Has your relative used day care services provided by<br>a local authority social services department,<br>voluntary organization, or NHS (not hospital) over<br>the past 3 months? | 1 or more days =<br>Yes<br>0 days = No             | Yes / No                                                  |
|                              |                    | Number of days received per week                                                                                                                                                  |                                                    |                                                           |
|                              | COMPAS             | Does your relative use day care services?                                                                                                                                         |                                                    |                                                           |
|                              |                    | No / Yes, ... hours per week                                                                                                                                                      |                                                    |                                                           |
|                              | MCSP 1             | Inclusion criteria of the original study (all participants)                                                                                                                       |                                                    |                                                           |

Social & community resources

|                                                         |         |                                                                                                                  |                           |                                                        |
|---------------------------------------------------------|---------|------------------------------------------------------------------------------------------------------------------|---------------------------|--------------------------------------------------------|
|                                                         | MCSP 2  | used day care services)                                                                                          |                           |                                                        |
| Use of case management                                  | REMCARE | Have you or your relative care used services from a care manager over the past 3 months?                         | 1 or more = Yes<br>0 = No | <i>Harmonized across REMCARE, FAMCARE and COMPAS.</i>  |
|                                                         | FAMCARE |                                                                                                                  |                           |                                                        |
|                                                         |         | Number of visits                                                                                                 |                           |                                                        |
|                                                         | COMPAS  | Receiving care from a case manager (recruitment criterion)                                                       | Yes / No                  |                                                        |
|                                                         |         | No / Yes                                                                                                         |                           |                                                        |
|                                                         | MCSP 1  | n/a                                                                                                              |                           |                                                        |
|                                                         | MCSP 2  |                                                                                                                  |                           |                                                        |
| Loneliness caregiver                                    | COMPAS  | Jong-Gierveld loneliness scale (0-11)                                                                            |                           | <i>Harmonized across COMPAS and MCSP studies.</i>      |
|                                                         | MCSP 1  |                                                                                                                  |                           |                                                        |
|                                                         | MCSP 2  |                                                                                                                  |                           |                                                        |
|                                                         | REMCARE | n/a                                                                                                              |                           | Continuous score 0-11                                  |
|                                                         | FAMCARE |                                                                                                                  |                           |                                                        |
| Social support / Help or support from family or friends | REMCARE | Other than yourself, do any other people (such as friends or relatives) regularly provide help for your relative |                           | <i>Harmonized across REMCARE, FAMCARE, COMPAS</i>      |
|                                                         | FAMCARE |                                                                                                                  |                           |                                                        |
|                                                         |         | Yes / No                                                                                                         | Yes / No                  |                                                        |
|                                                         | COMPAS  | Does your relative receive help from other informal caregivers or volunteers?                                    |                           |                                                        |
|                                                         |         | Yes / No                                                                                                         |                           |                                                        |
|                                                         | MCSP 1  | SSL-12 (12-48)                                                                                                   |                           | <i>In MCSP studies:</i>                                |
|                                                         | MCSP 2  |                                                                                                                  |                           | Continuous score 12-48                                 |
| <b>Caregiver's individual resources</b>                 | REMCARE | n/a                                                                                                              |                           | <i>Harmonized across FAMCARE, COMPAS, MCSP studies</i> |
|                                                         | FAMCARE | SSCQ (0-7)                                                                                                       |                           | Continuous scale 0-7                                   |
|                                                         | COMPAS  |                                                                                                                  |                           |                                                        |
|                                                         | MCSP 1  | SSCQ (0-7)                                                                                                       |                           |                                                        |
|                                                         | MCSP 2  |                                                                                                                  |                           |                                                        |
| Use of coping styles                                    | MCSP 1  | Jalowiec scale (0-180)                                                                                           |                           | <i>Not harmonized</i>                                  |
|                                                         | MCSP 2  |                                                                                                                  |                           |                                                        |
|                                                         | REMCARE | n/a                                                                                                              |                           |                                                        |

|                   |                                        |                                       |                       |
|-------------------|----------------------------------------|---------------------------------------|-----------------------|
|                   | FAMCARE<br>COMPAS                      |                                       |                       |
| Mastery           | COMPAS                                 | Pearlin mastery scale (5- <u>25</u> ) | <i>Not harmonized</i> |
|                   | REMCARE<br>FAMCARE<br>MCSP 1<br>MCSP 2 | n/a                                   |                       |
| Feelings of guilt | FAMCARE                                | Guilt scale ( <u>0</u> -40)           | <i>Not harmonized</i> |
|                   | REMCARE<br>COMPAS<br>MCSP 1<br>MCSP 2  | n/a                                   |                       |

More positive scores are underlined.  
 Abbreviations: ASEP, Assessment Scale for Elderly Patients; CDR, Clinical Dementia Rating; CSDD, Cornell Scale for Depression in Dementia; CSI, Caregiver Strain Index; EQ-5D, EuroQol- 5D; GDS, Global Deterioration Scale; GHQ, General Health Questionnaire; MMSE, Mini Mental State Examination; NPI, Neuropsychiatric Inventory; NPI-D, Neuropsychiatric Inventory- Distress; QCPR, Quality Caregiver Patient Relationship; SSCQ, Short Sense of Competence Questionnaire; SSL, Social Support List; RSS, Relatives' Stress Scale
